# Supplementary material
Source: publisher site journal article supplement (https://www.dovepress.com/article/280565)
Supplement: Supplementary file 1 [file get_supplementary_file.php]

## Supplementary figure

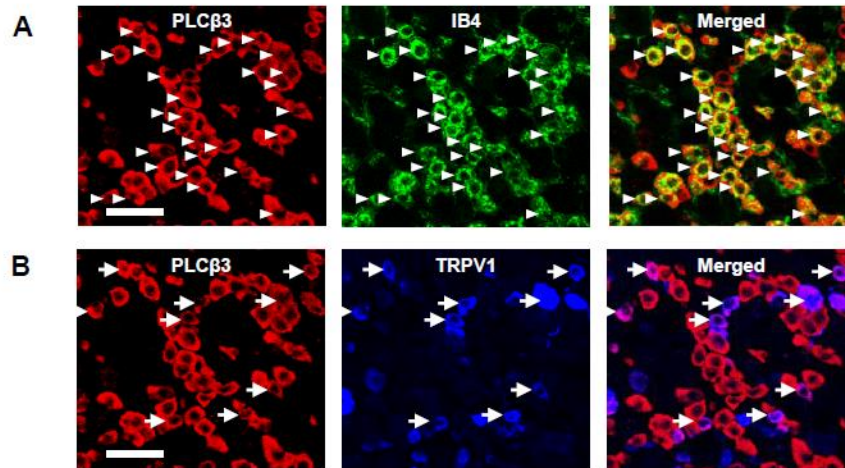

**Supplementary figure1** Detection of Co-localization in DRG neurons. Only neurons with clearly visible nuclei were counted. **(A)** Co-localization of PLCβ3 (red) with IB4 (green) in Figure 1B slice. Arrowheads indicate both PLCβ3-positive and IB4-positive neurons. 64% of the PLCβ3-expressing DRG neuron profiles were IB4-positive. Scale bar = 50 μm. **(B)** Co-localization of PLCβ3 (red) with TRPV1 (blue) in Figure 1B slice. Arrows indicate both PLCβ3-positive and TRPV1-positive neurons. 30% of the PLCβ3-expressing DRG neuron profiles were TRPV1-positive. Scale bar = 50 μm.

**Abbreviations:** DRG, dorsal root ganglion; PLCβ3, phospholipase Cβ3; IB4, isolectin B4; TRPV1, transient receptor potential vanilloid subfamily 1.
